# Supplementary material
Source: Research Square preprint supplement (doi:10.21203/rs.3.rs-9027573/v1)
Supplement: Supplementary file 1 [file c9371770b7f9bea7dee7f0fc.docx]

**Comparison of generated report between PlaqueSAM and GPT-5**

**1. First case**

**1.1 Report from PlaqueSAM**

| **Children Oral Hygiene Report** | |
| --- | --- |
| **Oral hygiene status** | **Poor** |
| **Detailed Dental Plaque Distribution** | 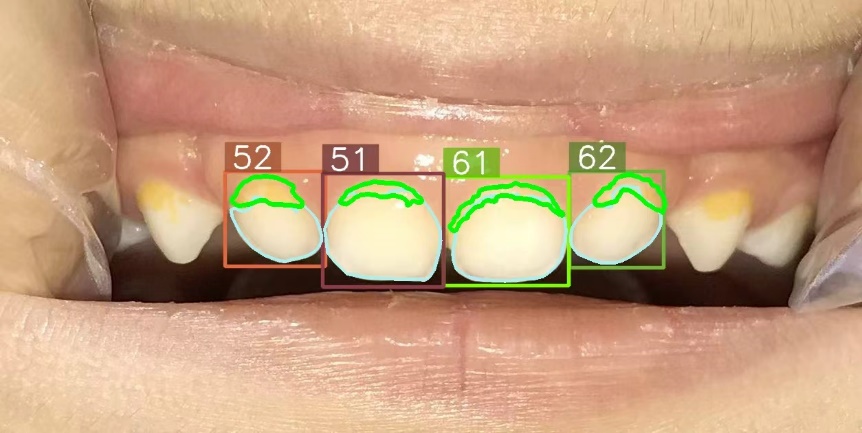  **Right Left**  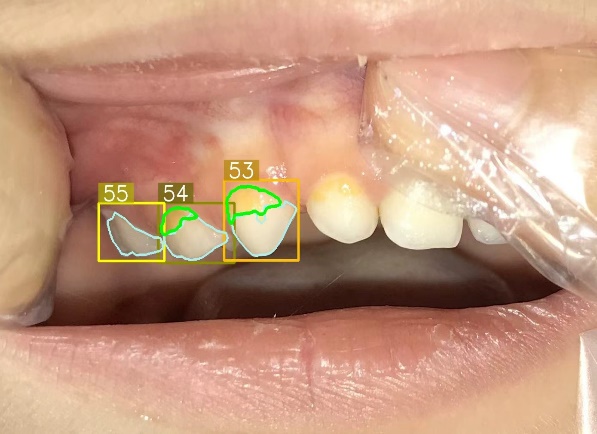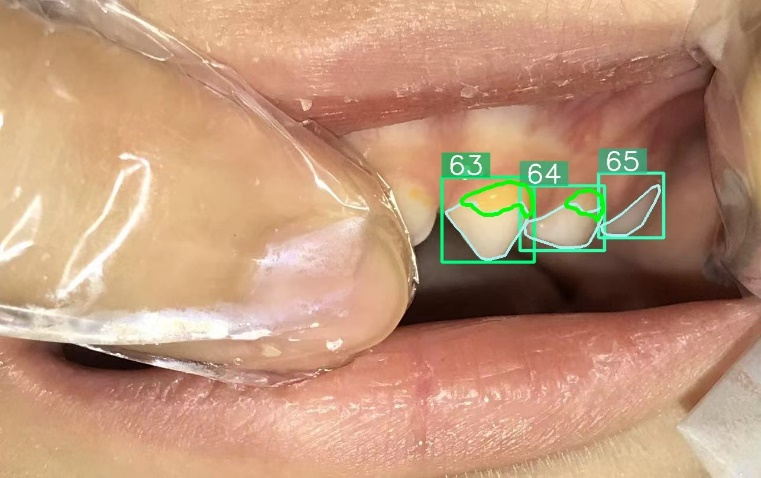  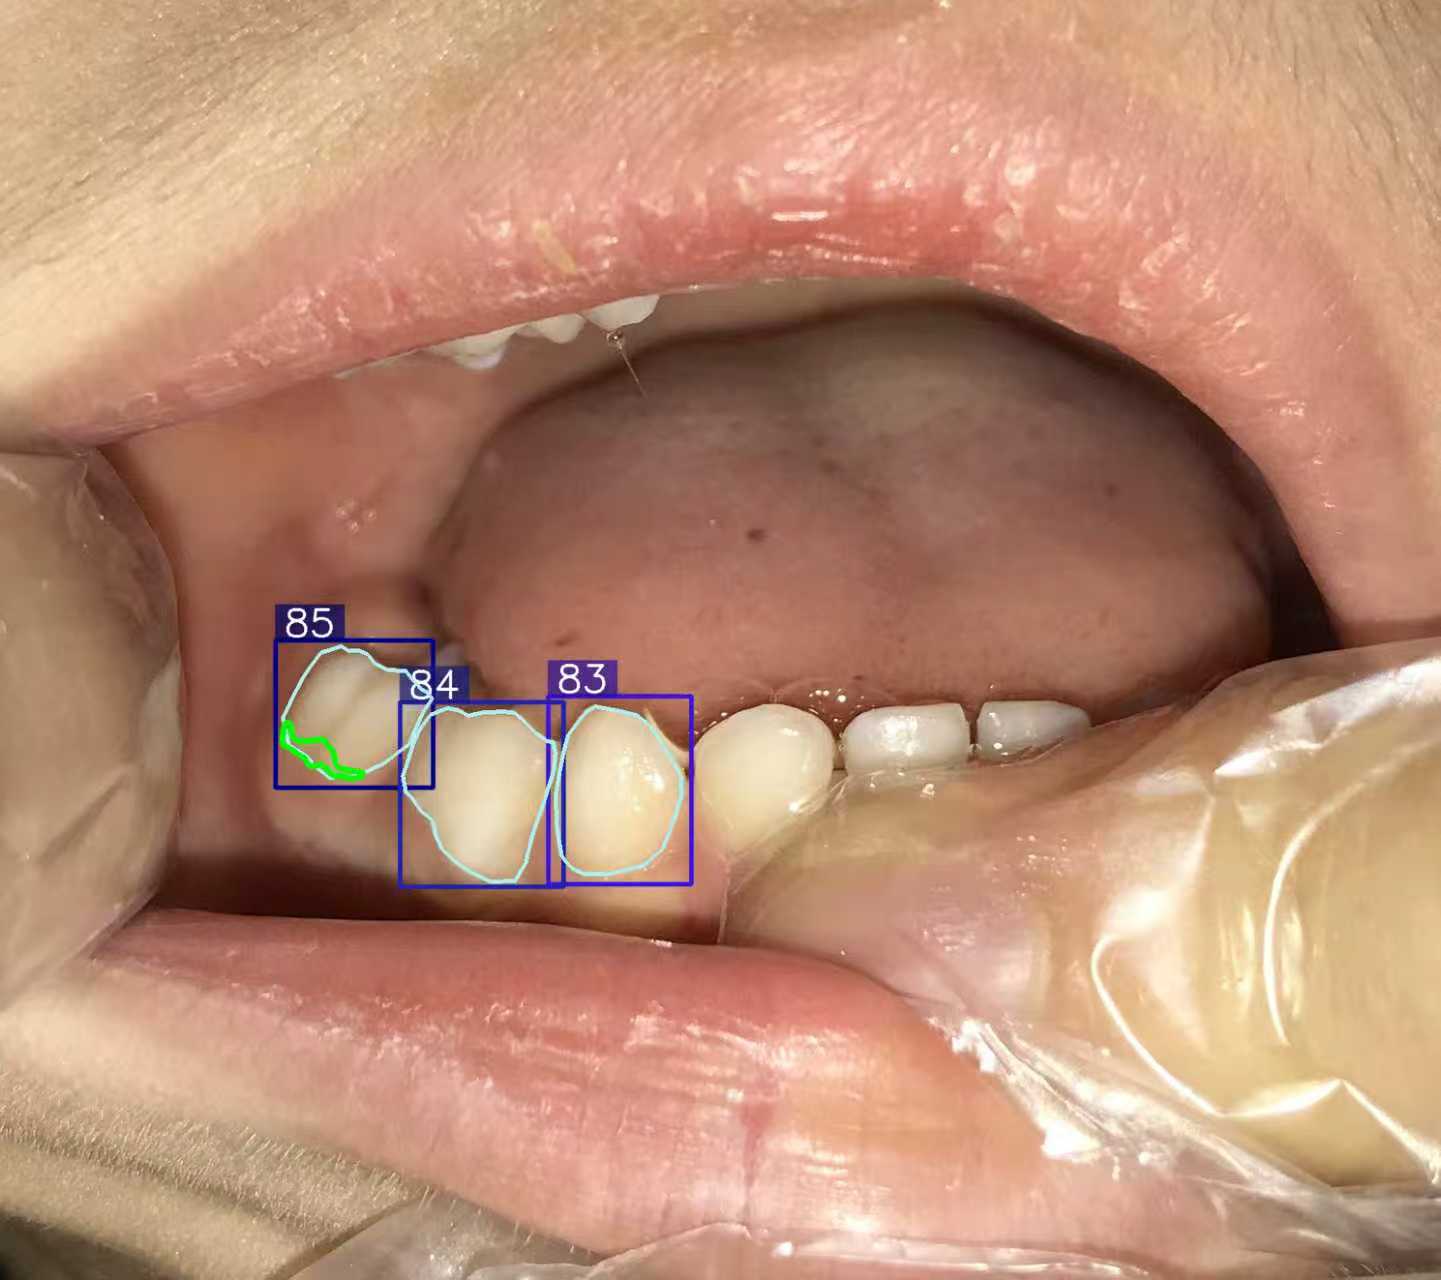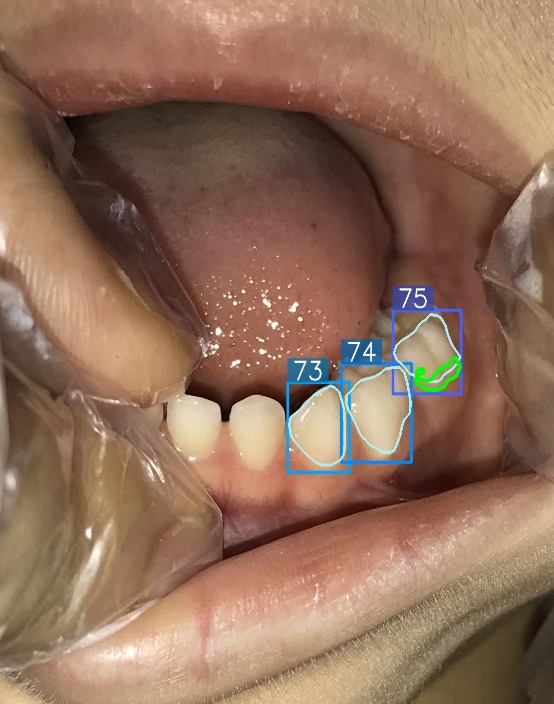    According to the child’s intraoral images from six views, dental plaque can be seen on the buccal surface of the following teeth:  **Upper Teeth:** 54, 53, 52, 51, 61, 62, 63, 64  **Lower Teeth:** 85, 75 |
| **Recommendations** | **For children:**   1. **Brushy Time Twice a Day!**   Brush your teeth in the morning and before you go to sleep—don’t forget!   1. **Ask for Help!**   Ask your parents to help you brush so you can get rid of the germs.   1. **Sugar is Sneaky!**   Try not to eat too many candies or drink too much soda or juice.   1. **Go See the Tooth Doctor!**   The dentist will help keep your teeth super clean and strong!  **For Parents or caregivers:**   1. Establish a clear brushing routine: help your child brush their teeth every morning and night. 2. Supervise and assist with brushing to ensure proper cleaning. 3. Use toothbrushes and fluoride toothpaste suitable for your child’s age. 4. Limit your child’s intake of sugary snacks and beverages. 5. Schedule a dental appointment for a professional cleaning and advice.   *We could only provide preliminary suggestion. If in doubts, please seek advice from any registered dentist. |

**1.2 Report from ChatGPT**

**Dental Plaque Screening Report**

**Subject:** Child (approx. 6–10 years old)
**Scope:** Visual plaque assessment using FDI tooth numbering for primary teeth (5x/6x upper, 7x/8x lower).

**Overall Findings**

The images show **moderate to heavy plaque accumulation** on multiple primary teeth, especially in the **maxillary (upper) arch**, with **predominant plaque on cervical (gumline) areas and proximal surfaces**. Some areas show **yellow–brown deposits**, consistent with mature plaque and possible early decay.

**Detailed Plaque Distribution by Region**

**1. Maxillary Anterior Region (Primary teeth 51, 52, 53, 61, 62, 63)**

Heavy plaque is visible especially on:

- **Tooth 52 (UR lateral incisor):** Yellow plaque on labial cervical margin and distal surface.
- **Tooth 51 (UR central incisor):** Visible plaque at cervical margin.
- **Tooth 61 (UL central incisor):** Mild plaque, mostly cervical.
- **Tooth 62 (UL lateral incisor):** Moderate cervical plaque.
- **Teeth 53 and 63 (canines):** Moderate plaque on cervical and proximal surfaces.

**Pattern:**
Anterior upper incisors show **continuous plaque banding along the gumline**, suggesting inadequate brushing of front teeth.

**2. Maxillary Posterior Region**

**Right side (Primary teeth 54, 55)**

- **Tooth 54 (first molar):** Heavy yellow–brown plaque on occlusal and buccal surfaces.
- **Tooth 55 (second molar):** Significant plaque on buccal surface, extending to cervical margin.

**Left side (Primary teeth 64, 65)**

- **Tooth 64 (first molar):** Moderate opaque yellow plaque on buccal surface.
- **Tooth 65 (second molar):** Heavy plaque and deposits on buccal and proximal surfaces.

**Pattern:**
Posterior maxillary teeth show **the heaviest plaque accumulation**, especially on buccal grooves and gumline—common in children due to difficult-to-clean areas.

**3. Mandibular Anterior Region (Primary teeth 71, 72, 73, 81, 82, 83)**

- Overall **mild plaque**, mostly thin layers.
- **Teeth 72 and 82 (lateral incisors):** Slight cervical plaque.
- Anterior mandibular region is comparatively clean.

**Pattern:**
Lower incisors appear brushed more effectively than the upper teeth.

**4. Mandibular Posterior Region**

**Right side (Primary teeth 84, 85)**

- **Tooth 84 (first molar):** Light–moderate plaque near cervical margin.
- **Tooth 85 (second molar):** Moderate plaque in occlusal pits.

**Left side (Primary teeth 74, 75)**

- **Tooth 74 (first molar):** Mild plaque.
- **Tooth 75 (second molar):** Moderate plaque on chewing surface.

**Pattern:**
Lower posterior teeth show a mix of mild-to-moderate plaque, but less severe than upper posterior teeth.

**Summary of Plaque Distribution**

- **Heaviest plaque:**
  Upper posterior molars (54, 55, 64, 65) and upper lateral incisors (52, 62).
- **Moderate plaque:**
  Upper central incisors (51, 61) and canines (53, 63); lower molars.
- **Least plaque:**
  Lower anterior region (71–83).

**Clinical Interpretation**

The pattern suggests:

- Child may brush lower teeth more effectively than upper teeth.
- Upper molars and upper incisors require targeted hygiene instruction.
- The colour/quantity of plaque suggests **longer retention time**, indicating areas regularly missed during brushing.

**Recommendations**

- Emphasize brushing of **upper molars and upper front teeth**, especially the gumline.
- Introduce **parent-assisted brushing** for posterior teeth.
- Consider using **disclosing solution** to help the child visualize missed plaque areas.
- Reassess brushing technique and fluoride exposure.

**2. Second case**

**2.1 Report from PlaqueSAM**

| **Children Oral Hygiene Report** | |
| --- | --- |
| **Oral hygiene status** | **Normal** |
| **Detailed Dental Plaque Distribution** | **Right** 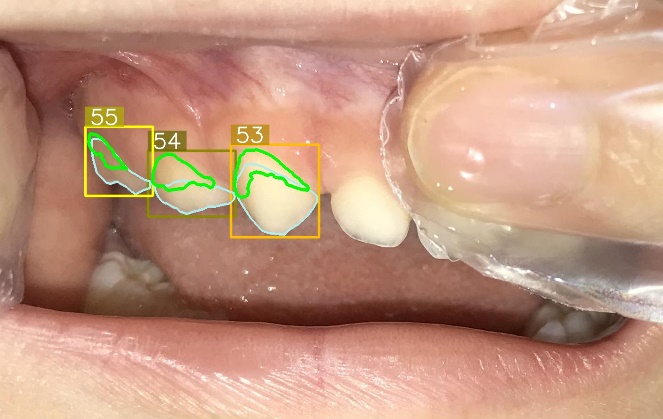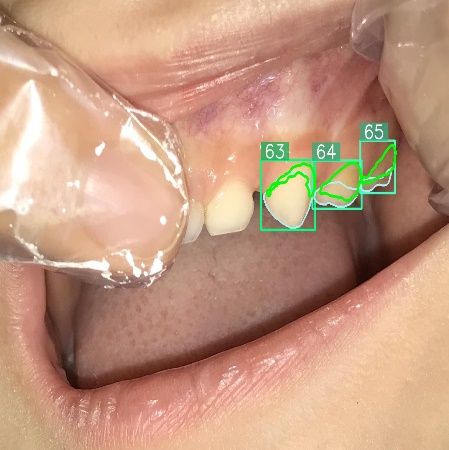 **Left**  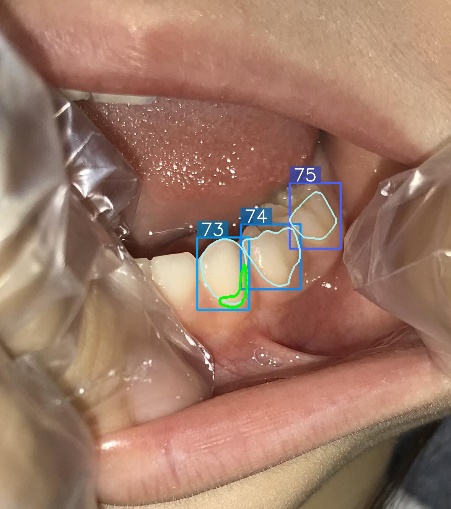  According to the child’s intraoral images from six views, dental plaque can be seen on the buccal surface of the following teeth:  **Upper Teeth:** 55,54,53,63,64,65  **Lower Teeth:** 73 |
| **Recommendations** | **For children:**   1. **Keep Brushing!**   Brush your teeth two times every day.   1. **Brush Everywhere!**   Make sure you brush all your teeth, not just the front ones!   1. **Yummy Healthy Snacks!**   Choose healthy fruits, such as applesinstead of candies.   1. **New Toothbrush, Yay!**   Get a cool new toothbrush when your old one gets fuzzy or worn out.   1. **Tell a your parents if Something Hurts!**   If your gums bleed or your teeth hurt, let someone know.  **For Parents or caregivers:**   1. Encourage consistent brushing (twice daily). 2. Reinforce proper brushing techniques. 3. Offer healthy snacks like fruits, vegetables, and cheese. 4. Replace your child’s toothbrush every 3 months or sooner if it becomes worn. 5. Monitor your child for signs of dental issues such as bleeding gums or tooth pain, and consult a dentist if needed.   *We could only provide preliminary suggestion. If in doubts, please seek advice from any registered dentist. |

**2.2 Report from ChatGPT**

**1. General impression**

- Dentition: mixed/late primary stage in a child roughly 6–10 years old.
- Overall tooth surfaces appear clean with **no heavy, obvious plaque deposits**.
- Gingival margins look generally healthy and pink, with no clear swelling or redness suggesting heavy chronic plaque accumulation.

Visible plaque (whitish/yellow, opaque, or matte deposits) is mainly seen:

- Along **gingival margins of several primary molars**, especially in the **upper right (FDI quadrant 1)** and **upper left (quadrant 2)**.
- In some **fissures and pits of primary molars**, where toothbrush bristles may not reach easily.

**2. Quadrant‑by‑quadrant description (FDI numbering)**

Because every area is not perfectly visible, only teeth/surfaces where plaque can reasonably be identified are listed.

**2.1. Upper right (Quadrant 1: 11–16 / 51–55)**

Likely teeth present:

- Permanent central incisor 11 (or primary 51 depending on eruption stage)
- Permanent lateral 12 / primary 52
- Primary canine 53
- Primary first and second molars 54, 55

**Observed plaque**

- **Tooth 54 (upper right first primary molar)**
  - **Buccal/cervical**: thin, whitish band of plaque along the gingival margin.
  - **Occlusal pits/fissures**: slight opaque film visible in grooves.
- **Tooth 55 (upper right second primary molar)**
  - **Buccal/cervical**: mild plaque accumulation at the gingival third, especially toward the distal aspect.
  - **Occlusal**: grooves appear slightly coated.
- **Teeth 11/12/53**
  - Labial surfaces look glossy and mostly free of visible plaque. Tiny traces might be present at gingival margins but not clearly detectable from the images.

**Summary for Q1:**
Light plaque, mainly on the **buccal gingival third and occlusal fissures of 54 and 55**.

**2.2. Upper anterior and upper left (Quadrant 2: 21–26 / 61–65)**

Likely teeth present:

- Centrals 11, 21 (or 51, 61)
- Laterals 12, 22 (or 52, 62)
- Canines 53, 63
- Primary molars 64, 65

**Observed plaque**

- **Teeth 21/22 (or 61/62)** – upper left central and lateral incisors
  - **Labial**: surfaces look smooth and shiny; no distinct plaque line.
- **Tooth 63 (upper left primary canine)**
  - **Labial**: appears mostly clean; no clear band of plaque.
- **Tooth 64 (upper left first primary molar)**
  - **Buccal/cervical**: faint whitish line along gingival margin compatible with early plaque.
- **Tooth 65 (upper left second primary molar)**
  - **Buccal/cervical**: mild plaque along the gingival margin, slightly more than on 64.
  - **Occlusal**: fissures show a thin, opaque film.

**Summary for Q2:**
Again, **light plaque at gingival margins of 64 and 65**, with mostly clean anterior teeth.

**2.3. Lower left (Quadrant 3: 31–36 / 71–75)**

Likely teeth present:

- Incisors 31–33 (or 71–73)
- Canine 33
- Primary molars 74, 75

**Observed plaque**

- **Incisors 31/32/41 equivalents in this view**
  - **Labial**: look smooth and shiny; no visible plaque lines.
- **Tooth 74 (lower left first primary molar)**
  - **Buccal/cervical**: minimal, thin plaque band at gingival margin (may be early accumulation).
  - **Occlusal**: grooves reasonably clean.
- **Tooth 75 (lower left second primary molar)**
  - **Buccal/cervical**: very mild plaque at gingival third; difficult to see clearly but appears slightly dull compared with enamel above.

**Summary for Q3:**
**Very light plaque** on buccal gingival thirds of 74 and 75; lower left incisors appear clean.

**2.4. Lower right (Quadrant 4: 41–46 / 81–85)**

Likely teeth present:

- Incisors 41–42 (or 81–82)
- Canine 83
- Primary molars 84, 85

**Observed plaque**

- **Lower anterior teeth (41/42)**
  - Labial surfaces show normal shine; no visible plaque.
- **Tooth 84 (lower right first primary molar)**
  - **Buccal/cervical**: discrete plaque along gingival margin, particularly at mesio‑buccal area.
  - **Occlusal**: fissures show a slightly matte appearance.
- **Tooth 85 (lower right second primary molar)**
  - **Buccal/cervical**: similar mild plaque band along gingival margin.
  - **Occlusal**: possible film in pits.

**Summary for Q4:**
Mild plaque on **gingival and occlusal surfaces of 84 and 85**; lower right incisors appear plaque‑free visually.

**3. Overall plaque distribution pattern**

- **Most affected sites**
  - **Primary molars in all quadrants (teeth 54, 55, 64, 65, 74, 75, 84, 85)**.
  - Deposits are **predominantly on the buccal gingival third** and, to a lesser degree, within **occlusal pits and fissures**.
- **Relatively plaque‑free sites**
  - **Upper and lower incisors and canines** (teeth 11–13/21–23 or 51–53/61–63, and 31–33/41–43 or 71–73/81–83).
  - These surfaces look smooth and glossy without a visible band at the gingival margin.
- **Symmetry**
  - Plaque presence is **bilaterally symmetrical**: similar light accumulation on right and left primary molars in both jaws, suggesting brushing is done but less effectively on posterior teeth.
- **Gingival response**
  - Gingiva around most teeth appears pink with normal contour; no obvious generalized inflammation.
  - This supports the impression that plaque level is currently **low to mild**, but posterior areas could develop issues if not improved.

**4. Summary statement for screening form**

On visual inspection without disclosing solution, this 6–10‑year‑old child shows **low to mild dental plaque accumulation**, mainly confined to the **buccal gingival margins and occlusal fissures of primary molars in all four quadrants (FDI: 54, 55, 64, 65, 74, 75, 84, 85)**.
Anterior teeth (incisors and canines; FDI 11–13, 21–23, 31–33, 41–43 or their primary equivalents 51–53, 61–63, 71–73, 81–83) appear largely free of visible plaque.

**3. Third case**

**3.1 Report from PlaqueSAM**

| **Children Oral Hygiene Report** | |
| --- | --- |
| **Oral hygiene status** | **Good** |
| **Detailed Dental Plaque Distribution** | **Right** 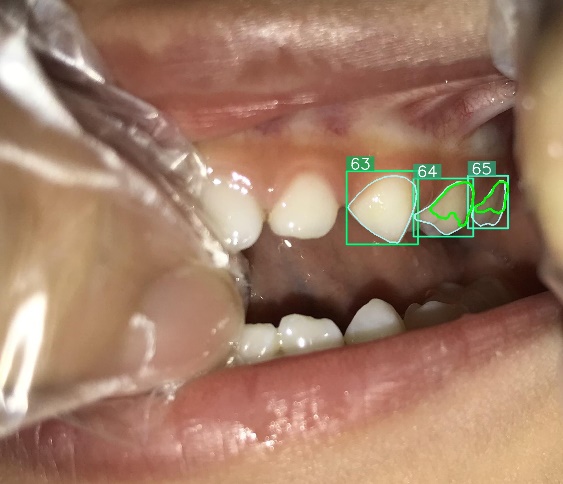 **Left**    According to the child’s intraoral images from six views, dental plaque can be seen on the buccal surface of the following teeth:  **Upper Teeth:** 64,65 |
| **Recommendations** | **For children:**   1. **You’re a Tooth Hero!**   Keep brushing every day—great job!   1. **Try Swishy Mouthwash!**   Use a kid’s mouthwash for an even fresher smile.   1. **Learn About Teeth!**   Ask questions and learn why taking care of your teeth is awesome.   1. **Visit the Tooth Fairy’s Friend!**   Go to the dentist twice a year to keep your teeth happy.  **For Parents or caregivers:**   1. Praise and reinforce your child’s good oral care habits. 2. Consider adding a child-friendly mouthwash to their routine. 3. Educate them about the importance of oral health and regular check-ups. 4. Maintain regular dental visits every 6 months.   *We could only provide preliminary suggestion. If in doubts, please seek advice from any registered dentist. |

**3.2 Report from ChatGPT**

**1. General observations**

- Dentition: Appears to be a **primary (deciduous) dentition** in a 6–10‑year‑old child (no clear permanent incisors or molars visible).
- Surfaces visible: Mainly **labial/buccal and cervical** aspects of the incisors and canines; parts of primary molars are partly visible but not well enough to assess occlusal plaque.
- Lighting and specular reflection from the flash and saliva make very thin plaque difficult to see; this report is limited to **clinically visible, accumulated plaque**.

Overall, the teeth appear **generally clean**, with **no heavy, clearly visible plaque deposits** on the labial surfaces. Where plaque is detectable, it is **thin, marginal, and localized near the gingival margin or in the cervical third**.

**2. Tooth‑by‑tooth plaque description (FDI)**

**Maxillary anterior region (FDI 51–63)**

**Teeth seen clearly:**

- Right: 53 (canine), 52, 51
- Left: 61, 62, 63 (canine)

**Plaque distribution**

- **51, 61 (maxillary central incisors)**
  - Labial surfaces look smooth and glossy, with **no obvious plaque accumulations** along the gingival margin or incisal edges.
  - Interdental areas between 52–51 and 61–62 are not fully exposed, so **plaque presence there cannot be reliably assessed** from these images.
- **52, 62 (maxillary lateral incisors)**
  - Similar to the centrals: **no clearly visible plaque** on the mid‑labial surface or incisal region.
  - Gingival margins appear clean; no chalky or opaque band of plaque is evident.
- **53, 63 (maxillary canines)**
  - Only the mesio‑labial portions are visible.
  - **No distinct plaque lines or deposits** are seen at the cervical/gingival area.
  - Any plaque, if present, is likely **very thin and not clinically obvious** in the photographs.

**Summary for maxillary anterior:**

- **Visible plaque level: very low.**
- Any plaque present is likely **non‑disclosed, thin biofilm** that is not distinguishable from the photos.

**Mandibular anterior region (FDI 71–83)**

**Teeth seen clearly:**

- Right: 83 (canine), 82, 81
- Left: 71, 72, 73 (canine)

**Plaque distribution**

- **81, 71 (mandibular central incisors)**
  - Labial surfaces appear smooth, with a clear reflection from the flash.
  - **No visible plaque bands or accumulations** at the gingival margin.
  - Gingival tissues around these teeth look healthy, supporting a **low‑plaque impression** in this area.
- **82, 72 (mandibular lateral incisors)**
  - Labial surfaces and cervical thirds appear **free from visible plaque**.
  - No yellowish/whitish deposits or matte areas can be distinguished.
- **83, 73 (mandibular canines)**
  - Only parts of the labial/buccal aspects are visible.
  - Within what can be seen, there are **no distinct plaque deposits** at the gingival margin or cusp tip areas.

**Summary for mandibular anterior:**

- **Visible plaque level: very low.**
- No site shows clearly visible, mature plaque on the labial/cervical area in these photos.

**Posterior segments (FDI 54–55, 64–65, 74–75, 84–85)**

- Portions of the **primary molars** are seen in lateral views, but they are partially obscured by cheeks, lips, and fingers.
- The **buccal surfaces** of some molars (for example, **54, 55 on the upper right and 64, 65 on the upper left; 74–75 and 84–85 in the mandible**) appear **generally clean in the visible portions**, with no obvious cervical plaque lines.
- **Occlusal surfaces** (pits and fissures) are **not clearly visible** in the images, so **plaque in fissures cannot be assessed**. This is important, as plaque in occlusal grooves is a high‑risk site in children.

**3. Overall plaque distribution pattern**

Based on what can be seen:

- **General level:**
  - **Very low visible plaque accumulation** on accessible labial/buccal surfaces of both maxillary and mandibular primary teeth.
- **Primary plaque‑prone zones checked:**
  - **Cervical/gingival third of incisors and canines (FDI 51–53, 61–63, 71–73, 81–83)** – appear mostly clean.
  - **Buccal cervical areas of primary molars** – in the limited visible portions, no clear deposits are seen.
- **Zones not adequately visualized (screening limitation):**
  - **Interproximal surfaces** between all anterior and posterior teeth.
  - **Occlusal surfaces of molars** (54–55, 64–65, 74–75, 84–85).
  - **Lingual/palatal surfaces** of all teeth.

These areas commonly harbor plaque in preschool children and would typically require either direct clinical inspection, use of mirrors, and/or **plaque disclosing solution** for accurate screening.

**4. Suggested phrasing for a preschool screening form**

You could summarize the findings for this child as:

- **FDI teeth examined:** 51–53, 61–63, 71–73, 81–83, and partially 54–55, 64–65, 74–75, 84–85.
- **Visible plaque (without disclosing agent):**
  - Maxillary anterior (51–53, 61–63): *No clearly visible plaque on labial/gingival surfaces.*
  - Mandibular anterior (71–73, 81–83): *No clearly visible plaque on labial/gingival surfaces.*
  - Buccal aspects of primary molars (54–55, 64–65, 74–75, 84–85): *No obvious cervical plaque deposits in the visible areas.*
- **Overall plaque status:** *Very low visible plaque; likely presence of thin, non‑disclosed biofilm, especially interproximally and in occlusal fissures (not assessable from photographs).*

**5. Notes for methodology (if you’re designing a screening protocol)**

For preschool plaque surveys based on photographs:

1. **Standardize views** (full occlusal, buccal anterior, buccal posterior right/left, lingual where possible).
2. Consider using a **plaque disclosing agent** to make thin plaque bands visible in photos; otherwise, very low‑level plaque will be underestimated.
3. Define a simple scoring system, e.g., for each index tooth (51, 61, 71, 81, 54, 64, 74, 84):
   - 0 = no visible plaque
   - 1 = thin band at gingival margin
   - 2 = plaque covering >1/3 of surface

For this specific child, with the current non‑disclosed images, all clearly visible anterior teeth would be scored **0** on that kind of index.
